1 Title

2 **A long noncoding RNA acts as a post-transcriptional regulator of heat shock protein 70 kDa**  
3 **synthesis in the cold hardy *Diamesa tonsa* under heat shock**

4

5 Bernabò P.<sup>1,2</sup>, Viero G<sup>2</sup>, Lencioni V.<sup>1\*</sup>

6

7 <sup>1</sup> Department of Invertebrate Zoology and Hydrobiology, MUSE-Museo delle Scienze, Corso del  
8 Lavoro e della Scienza 3, 38123 Trento, Italy

9 <sup>2</sup> Institute of Biophysics-CNR Trento Unit, Via Sommarive 18, 38123, Povo, Trento, Italy

10 \* Corresponding author: E-mail [valeria.lencioni@muse.it](mailto:valeria.lencioni@muse.it)

11

12 Running title

13 **Role of lncRNA in heat shock response of *Diamesa tonsa***

14

15 **Abstract**

16 Cold stenothermal insects living in glacier-fed streams are stressed by temperature variations  
17 resulting from glacial retreat during global warming. The molecular aspects of insect response to  
18 environmental stresses remain largely unexplored. The aim of this study was to expand our  
19 knowledge of how a cold stenothermal organism controls gene expression at the transcriptional,  
20 translational, and protein level under warming conditions. Using the chironomid *Diamesa tonsa* as  
21 target species and a combination of RACE, qPCR, polysomal profiling, western blotting, and  
22 bioinformatics techniques, we discovered a new molecular pathway leading to previously overlooked  
23 adaptive strategies to stress. We obtained and characterized the complete cDNA sequences of three  
24 heat shock inducible 70 (*hsp70*) and two members of heat-shock cognate 70 (*hsc70*). Strikingly, we  
25 showed that a novel pseudo-*hsp70* gene encoding a putative long noncoding RNA (lncRNA) which

26 is transcribed during thermal stress, acting as a ribosome sponge to provide post-transcriptional  
27 control of HSP70 protein levels. The expression of the pseudo-hsp70 gene and its function suggest  
28 the existence of a new and unexpected mechanism to cope with thermal stress: lowering the pace of  
29 protein production to save energy and optimize resources for recovery.

30

31 **Keywords:** Heat Shock Response, gene expression, polysomal profiling, chironomids, climate  
32 change

## 33 **Introduction**

34 Understanding how freshwater species potentially react and adapt to climate change is a major  
35 challenge in predicting future biodiversity trends [1]. This is particularly important in high mountain  
36 freshwaters where migration and dispersion to escape stressors are hampered by isolation and habitat  
37 fragmentation [2, 3, 4]. Owing to shrinking glaciers, water temperature of glacier-fed streams is  
38 increasing while their discharge is decreasing, affecting taxonomical and functional diversity of the  
39 animal and vegetal communities [5, 6]. Cold stenothermal species adapted to live at temperatures  
40 close to their physiological limits might only survive and reproduce if they can adapt to new  
41 environmental conditions or if they are able to avoid the stressor adopting specific behaviours [7].  
42 Barring these abilities, they are expected to disappear [8]. In the mountaintop environment exposure  
43 is magnified because the rate of warming is amplified with elevation, with high mountain ecosystems  
44 experiencing more rapid rate of temperature increase than those in lowlands [9]. Studying the  
45 adaptive potential of these species is indeed essential for prediction of the consequences on biota and  
46 habitats of global warming in glacierized regions [10].

47 To detail the molecular response to increased temperature in cold stenothermal species inhabiting  
48 glacier-fed streams, we chose *Diamesa tonsa* (Haliday), belonging to the *cinerella* species group  
49 (Diptera: Chironomidae). Six Palaearctic species are ascribed to this group, all inhabiting cold  
50 running waters, with *D. tonsa* being one of the most common in the Mediterranean Basin as well as  
51 Northern Europe and Russia [11]. Larvae of *D. cinerella* gr. are freeze-tolerant, with a thermal  
52 optimum below 6 °C [12], and survive short-term heat shock (HS) by developing a Heat Shock  
53 Response (HSR) based on the synthesis of Heat Shock Proteins (HSPs) [13].

54 HSR based on HSPs has been characterized for a wide range of species and found to exhibit a high  
55 degree of conservation of its basic properties across prokaryotes and eukaryotes [14]. Under non-  
56 stressful conditions HSPs act as molecular chaperones to stabilize actively denaturing proteins, refold  
57 proteins that have already denatured, and direct irreversibly denatured proteins to the proteolytic

58 machinery of the cell [15, 16, 17]. Also, under non-stressful conditions HSPs facilitate the correct  
59 folding of proteins during translation and their transport across membranes [18, 19]. Among HSPs  
60 the 70 kDa family, consisting of inducible (HSP70) and constitutive (heat shock cognate, HSC70)  
61 forms, is the most studied in relation to thermal stress and has been found in all organisms  
62 investigated to date [20, 21]. [22] and [13] demonstrated that HSC70 plays a role in cold resistance  
63 for *D. cinerella* gr. larvae and that the HSR is comprised of a strong transcriptional boost of the  
64 inducible HSP70 gene at a temperature six times higher than that at which they live in nature. The  
65 involvement of HSC70 and HSP70 in cold and heat tolerance was observed in other cold adapted  
66 chironomids such as adults of *Belgica antarctica* [23] and larvae of *Pseudodiamesa branickii* [24].  
67 Knowledge of how these insects control gene expression at the transcriptional, translational and  
68 protein level under heating is still under-explored. The present study aims to address this using a  
69 multi-level approach to study HSR at the transcriptional, translational and protein level in *D. tonsa*.  
70 This is particularly important because studying changes in gene expression only at the transcriptional  
71 level may be misleading [25, 26] given the poor average correlation between protein and transcript  
72 [27, 28] due to post-transcriptional controls of gene expression. Here we hypothesize that, similar to  
73 observations in higher eukaryotes, post- transcriptional control of *hsp70* and *hsc70* gene expression  
74 in insects may exist. In line with this hypothesis, we identified a novel bio-molecular process in cold  
75 adapted organisms, shedding light into a new adaptation strategy to cope with heat stress involving a  
76 long noncoding RNA (lncRNA). Intriguingly, over the last few years, lncRNA with putative  
77 regulatory function relating to HSR has begun to attract attention, and several of lncRNAs are  
78 implicated in mammalian HSR [29]. At present, there are no reports about the involvement of  
79 lncRNAs in organisms that, like *D. tonsa*, are actually facing global warming challenges in the wild.

80

## 81 **Material and Methods**

### 82 *Animal model and collection*

83 Fourth-instar larvae of *D. tonsa* were used as an animal model. *D. tonsa* is a Palearctic species well  
84 distributed in the European mountain regions, particularly frequent in the Alps and the Apennines  
85 (Fauna Europaea: <https://fauna-eu.org/>). Larvae were collected with a 30 × 30 cm pond net (100 µm  
86 mesh size) in mats of the chrysophyte *Hydrurus foetidus*, in winter 2016, in the glacier-fed stream  
87 Frigidolfo (Lombardy Province, NE Italy, 1584 m a.s.l., 10°30'19.32" N; 46°17' 51.07" E). The  
88 Frigidolfo stream was characterized by clear (3.8±1.4 Nephelometric Turbidity Unit) and well  
89 oxygenated (per cent oxygen saturation= 80% - 90%) waters, with a mean temperature of 4 °C  
90 during the sampling period, recorded using a field multiprobe (Hydrolab Quanta, Hydrolab  
91 Corporation®, Texas, USA). Larvae were sorted in the field with tweezers, transferred to plastic  
92 bottles filled with stream water and transported to the laboratory via cooling bag within 2 hours of  
93 collection. Animals were reared in 500-mL glass beaker (max 50 specimens/beaker) with filtered  
94 stream water (on Whatman GF/C, particle retention 1.2 µm) in a thermostatic chamber (ISCO, mod.  
95 FTD250-plus) at 4 °C with an aerator to maintain oxygen saturation above 80%. The rearing  
96 temperature (4 °C) corresponded to the mean environmental temperature during sampling period  
97 [24].

98 Species identification was confirmed by head capsule morphology observed under the  
99 stereomicroscope (50 X) according to [30] within 24 h of sampling and by DNA Barcoding analysis  
100 of a sub-sample of the collected larvae based on mitochondrial *cox1* gene sequence [11].

101

#### 102 *Heat Shock Exposure*

103 Larvae of *D. tonsa* were exposed for 1 h to three different stress temperatures (15 °C, 26 °C and 32  
104 °C), chosen according to [13]: 26 °C is the highest temperature at which all the tested larvae were  
105 found alive after 1 h of stress; 32 °C is the LT<sub>50</sub> of the larvae in winter season; 15 °C selected as an  
106 intermediate temperature between the natural-ideal and sub-lethal temperatures.

107 3-5 groups of 5 larvae each were transferred to 25-mL plastic bottles (Kartell, Italy) filled with 10  
108 mL of preheated filtered stream water, under aeration to avoid mortality due to oxygen depletion.  
109 Larvae were then maintained at the stress temperature for 1 h. In all, 3-5 replicates of 5 specimens  
110 each were maintained at 4 °C for the entire period of each treatment and used as control (Ctrl). After  
111 treatments, the larvae were returned to 4°C (= rearing temperature) for 1 h and then only living  
112 (moving spontaneously) larvae were immediately flash frozen in liquid nitrogen. The larvae were  
113 stored at -80 °C until further analyses.

114

#### 115 *Isolation of total mRNA and reverse transcription*

116 Total RNA was extracted from 2-5 larvae using a commercial kit (TRIZOL, Life Technologies,  
117 Carlsbad, CA, USA), according to the manufacturer's protocol. RNA concentration was determined  
118 by UV absorption using a NanoDrop ND-1000 spectrophotometer (Thermo Fisher Scientific,  
119 Waltham, MA, USA) and quality checked by agarose gel electrophoresis. Total RNA (1 µg) was  
120 then reverse transcribed using the First Strand cDNA Synthesis Kit (Thermo Fisher Scientific) and  
121 oligo(dT) as primers.

122

#### 123 *hsp70 amplification*

124 cDNA (1 µL) from control larvae was amplified using the KAPA HiFi HotStart DNA Polymerase  
125 Taq (Kapa Biosystems, Wilmington, MA, USA), insect-HSP70 degenerate primers (from Bernabò *et*  
126 *al.*, 2011; Table 1) with a touchdown PCR protocol (annealing from 61 to 50 °C, - 1 °C/cycle + 30  
127 cycles at 50 °C).

128 PCR product was observed using agarose gel electrophoresis, cloned using the CloneJet PCR  
129 Cloning kit (Thermo Fisher Scientific), and transformed into DH5α competent cells. A minimum of  
130 40 colonies were analysed for the presence, size, and sequence of the PCR insert using colony PCR-  
131 RFLP analysis (TRu1 I restriction enzyme). Three different electrophoresis restriction patterns were

132 observed, and the corresponding inserts were sequenced.

133

#### 134 *5' and 3' RACE PCR*

135 Amplification of 5' and 3' ends of cDNA was performed according to the protocol described in the  
136 SMART RACE cDNA Amplification Kit (Takara Bio USA, Inc. Mountain View, CA, USA). Three  
137 pairs of gene-specific primers (GSP), one for each hsp70 isoform: *hsp70*, *hsc70-I* and *hsc70-II*, were  
138 designed based on the sequences obtained from amplification with degenerate primers (Table 1).  
139 Total RNA of *Diamesa tonsa* larvae was extracted according to the Trizol protocol (Thermo Fisher  
140 Scientific) and the quantity and quality assessed as described above. 1 µg of total RNA was first  
141 retrotranscribed with primers supplied in the kit and this first-strand cDNA was used directly in PCR  
142 amplification reactions that were achieved using a high-fidelity enzyme (KAPA HiFi DNA  
143 Polymerase, Kapa Biosystems), the Universal Primer Short (UPS, supplied by the kit), and gene-  
144 specific primer (GSP\_F for 3' RACE- cDNA or GSP\_R for 5' RACE- cDNA). The PCR was  
145 performed with the following cyclers protocol: 95 °C for 3 min, 25 cycles of 98 °C for 30 sec, 68 °C  
146 for 15 sec and 72 °C for 90 sec, and a final extension of 5 min at 72 °C.

147

#### 148 *Cloning and sequencing of 5' and 3'-RACE PCR products*

149 PCR products were run and purified by agarose gel electrophoresis and cloned into the pJET 1.2  
150 cloning vector (Thermo Fisher Scientific). The inserts were sequenced.

151

#### 152 *Sequences analysis*

153 Full-length cDNA sequences have been deposited in GenBank under accession numbers KC860254  
154 (*Dc-hsp70*), KC860255 (*Dc-hsc70-I*) and KC860256 (*Dc-hsc70-II*). When sequences were deposited,  
155 they were ascribed to a *Diamesa cinerella* gr., referred to as *Dc-*, only successively was the species  
156 identification confirmed as *D. tonsa*. Throughout the paper we decided to refer the genes to the

157 species “tonsa” as *Dt*-. The sequences were used to search for homology in other organisms by  
158 BLAST software on the NCBI website (<https://blast.ncbi.nlm.nih.gov/Blast.cgi>).  
159 Sequence alignments were carried out using the Bioedit software package and ORFs were identified  
160 with the aid of the software ORF Finder (<http://www.ncbi.nlm.nih.gov/projects/gorf/>). Molecular  
161 weights of the predicted proteins were calculated by Compute pI/Mw tool (ExPASy)  
162 ([http://web.expasy.org/compute\\_pi/](http://web.expasy.org/compute_pi/)). The phylogenetic trees were constructed using the “One Click”  
163 mode with default settings in the Phylogeny.fr platform (<http://www.phylogeny.fr>) [31].  
164 The presence of possible splicing sites was predicted using the BDGP: Splice Site Prediction by  
165 Neural Network ([http://www.fruitfly.org/seq\\_tools/splice.html](http://www.fruitfly.org/seq_tools/splice.html)).  
166 Specific primers for expression analysis were designed from the full-length cDNA sequences of *Dt*-  
167 *hsp70*, *Dt-hsc70I* and *Dt-hsc70II* (Table 1) using Primer3Web (<http://primer3.ut.ee>) and OligoCalc  
168 (<http://biotools.nubic.northwestern.edu/OligoCalc.html>).

169

#### 170 *Polysomal extraction*

171 Polysomes were extracted as reported in [26]. Briefly, 5 frozen larvae were pulverized under liquid  
172 nitrogen in a mortar with a pestle and the powder lysed in 0.8 mL of lysis buffer (10 mM Tris-HCl at  
173 pH 7.5, 10 mM NaCl, 10 mM MgCl<sub>2</sub>, 1% Triton-X100, 1% Na- deoxycholate, 0.4 U/μL  
174 SUPERase.In RNase Inhibitor (Life Technologies), 1 mM DTT, 0.2 mg/mL cycloheximide, 5 U/mL  
175 Dnase I). Following lysis, cellular debris was removed by centrifugation (13.200 rpm, 2 min at 4 °C)  
176 and the supernatant was kept ice-cold for 15 minutes. The cleared lysate was then centrifuged at  
177 13.200 rpm, 5 min at 4 °C to remove all nuclei and mitochondria. The supernatant obtained was  
178 layered onto a 12 mL linear sucrose gradient (15%–50% sucrose [w/v], in 30 mM Tris-HCl at pH  
179 7.5, 100 mM NaCl, 10 mM MgCl<sub>2</sub>) and centrifuged in a SW41Ti rotor (Beckman) at 4 °C and  
180 197.000 g for 100 min in a Beckman Optima LE-80K Ultracentrifuge. 1 mL fractions were collected  
181 with continuous absorbance monitoring at 254 nm using an ISCO UA-6 UV detector.



182

### 183 *Polysomal RNA extraction*

184 Sucrose fractions from the entire polysomal profile were divided into two groups (subpolysomal and  
185 polysomal fractions) and the pooled fractions were treated with 1% SDS and proteinase K (100  
186  $\mu\text{g/mL}$ ) for 75 minutes at 37 °C before phenol–chloroform RNA extraction. Polysomal RNA pellet  
187 was resuspended in 25  $\mu\text{L}$  of Rnase-free water. RNA was quantified by Nanodrop and the quality  
188 was assessed by agarose gel electrophoresis.

189

### 190 *Quantitative real-time RT-PCR (qPCR)*

191 Subpolysomal and polysomal RNA (500 ng) was reverse transcribed using the First Strand cDNA  
192 Synthesis Kit (Thermo Fisher Scientific) following the manufacturer’s instructions. cDNA was  
193 amplified by Real-Time PCR using Kapa Sybr Fast qPCR Mastermix (Kapa Biosystems) and  
194 specific primers (Table 1) on a CFX96 Touch™ Real-Time PCR Detection System (Biorad,  
195 Hercules, CA, USA). *Actin* was used as housekeeping gene normalization control (Table 1). For each  
196 condition, 3 biological replicates were prepared, and for each biological replicate, 3-4 Real-Time  
197 PCR amplifications were run. Each primer pair was validated for dimer formation by melting curve  
198 analysis. Amplification profiles were analysed using CFX Manager Software (analysis of the melting  
199 Curve for the presence of primer dimer) and relative expression levels were calculated using the  
200 delta/delta Ct method [32]. The log<sub>2</sub>  $\Delta\text{TE}$  (change of Translation Efficiency) was calculated as the  
201 ratio between the fold change at the polysomal level and the fold change at the sub-polysomal level  
202 of the gene of interest.

203

### 204 *Protein extraction and Western Blot analysis*

205 Protein was extracted from 5 live larvae using the methanol/chloroform protocol [33] and solubilized  
206 in electrophoresis sample buffer (Santa Cruz Biotechnology, Dallas, TX, USA) for SDS-

207 polyacrylamide gel electrophoresis and Western Blot analysis. Gel electrophoresis was performed  
208 using 12% Mini-PROTEAN-TGX Precast Protein Gels (Bio-Rad) and transferred to nitrocellulose  
209 membrane. Immunoblotting was performed using GAPDH (1:1,000, Santa Cruz Biotechnology) and  
210 HSP70 (1:800, Abcam, Cambridge, UK) primary antibodies and the corresponding HRP-conjugated  
211 secondary antibodies (1:2,000, Santa Cruz Biotechnology). The blots were developed with  
212 SuperSignal™ West Femto Maximum Sensitivity Substrate (Thermo Fisher Scientific) and acquired  
213 on a ChemDoc-It (BioRad Laboratories). The image analysis was performed using the ImageJ  
214 (<https://imagej.nih.gov/ij/>) image processing package.

215

#### 216 *Genomic DNA extraction and amplification*

217 Genomic DNA was extracted from a single larvae of *D. tonsa* using the DNeasy Blood & Tissue Kit  
218 (Qiagen, Hilden, Germany), following the manufacturer's instructions. The gDNA concentration was  
219 estimated by Qubit and about 20 ng of gDNA amplified with primers specifically designed to include  
220 the intron region (Hsp70 genomic F/R, Table 1) using PuReTaq Ready-To-Go™ PCR Beads (GE  
221 Healthcare, Chicago, IL, USA).

222

#### 223 *Gene copy number analysis*

224 The relative copy number for *hsp70* with and without intron was estimated by Real-Time PCR  
225 analysis using SYBR Green dye. Two pairs of primers that specifically recognize *hsp70 with intron*  
226 (Intron-F and Intron-R, Table 1) or *hsp70 without intron* (Hsp70 no intron-F and Hsp70 no intron-R,  
227 Table 1) were used to amplify gDNA by Real-Time PCR using qPCRBIO SyGreen Mix Separate-  
228 ROX (PCR Biosystem, Wayne, PA, USA) with Mic qPCR Cycler (Bio Molecular System, Upper  
229 Coomera, Australia). Consistent efficiency of the two primer pairs was analysed by the amplification  
230 of a serial dilution of gDNA. Four different larvae gDNAs were amplified and the  $\Delta C_t$  between the

231 *hsp70* and the *hsp70 + intron* signal calculated. The Relative Gene Copy Number was finally  
232 calculated using  $2^{\Delta Ct}$ .

233

## 234 **Results**

### 235 *Cloning, sequencing, and characterization of the Dt-hsp70 transcripts*

236 For detailed study of the HSR of *Diamesa tonsa*, we produced the complete sequences of *hsp*  
237 transcripts in this organism. We cloned the *hsp* transcripts, using degenerate primers based on a  
238 conserved region of insect's *hsp70*, and performed RACE PCR to amplify cDNAs. With this  
239 approach we successfully obtained sequences for three unique transcripts (Figure 1A and  
240 Supplementary Figures 1, 2). The nucleotide sequence of the first transcript was highly homologous  
241 to the well-known *hsp70* inducible isoform (Figure 1A, *Dt-hsp70*). The remaining transcripts were  
242 likely the constitutive isoforms (Supplementary Figures 1, 2, *Dt-hsc70-I*, *Dt-hsc70-II*).

243 Upon performing a cross-species alignment, we found that the cDNA sequence of *Dt-hsp70* shared  
244 high homology with other inducible *hsp70s* from other insects: 81% with *Chironomus yoshimatsui*  
245 (AB162946.1) and 72% with *Phenacoccus solenopsis* (KM221884.1), strongly suggesting that this  
246 transcript indeed belongs to the *hsp70* family. The *Dt-hsc70-I* showed high homology with  
247 constitutive form *hsp70* from other Diptera: 82% with both *Sitodiplosis mosellana* (KM014659.1)  
248 and *Polypedilum vanderplanki* (HM589530.1). Similarly, we found that *Dt-hsc70-II* shared the  
249 highest homology with *P. vanderplanki* (HM589531.1) and *Acyrtosiphon pisum*  
250 (NM\_001162948.1).

251 The alignment of deduced amino acid protein sequences resulted in characteristic *hsp70* family  
252 motifs, further supporting our hypothesis that these transcripts are *bona fide* products of the *hsp70*  
253 gene (Figure 1A and Supplementary Figure 1A). In particular, we found the motifs IDLGTTYS,  
254 DLGGGTFD, and IVLVGG and the cytoplasmic *hsp70* carboxyl-terminal region (EEVD) in the case  
255 of *Dt-hsp70* and *Dt-hsc70-I*. In *Dt-hsc70-II* we also found the characteristic ER localization signal

256 (KDEL) at the C-terminus (Figure 1A and Supplementary Figure 1A). A summary of the  
257 characteristics of all sequences and their deduced proteins is displayed in Table 2.  
258 Next, using both the nucleotide and the amino acid sequence of *Dt-hsp70*, we obtained two  
259 phylogenetic trees (Figure 1B and 1C). Interestingly, *Dt-hsp70* clustered with the *hsp70* of the  
260 closely related chironomids (*Chironomus* spp). The relationships displayed in the trees were in  
261 agreement with established Diptera phylogeny, with chironomids separated from other Nematocera  
262 and Brachycera [34, 35]. Similar results were obtained for *Dt-hsc70-I* and *Dt-hsc70-II* using the  
263 Phylogeny.fr tool on the ExPASy Proteomics server [31] (Supplementary Figure 2).

264

#### 265 *Identification of a novel hsp70-pseudogene encoding a putative lncRNA*

266 While analysing the response of the *Dt-hsp70* transcript to heat stress for 1 h and at 15°, 26°, and  
267 32 °C and using primers for *Dt-hsp70*, we serendipitously observed that two amplicons were  
268 produced from cDNA amplification (Figure 2A and Table 1). The unexpected second PCR amplicon  
269 was about 400 bp longer than the expected one and was observed exclusively in larvae exposed to  
270 heat stress. Intrigued by these results, we cloned and sequenced this alternative transcript and  
271 compared it to *Dt-hsp70* (Supplementary Figure 3). This alternative transcript has a short intron of  
272 404 bases (from nucleotide 421 to 854, donor site from nucleotide 421 to 435 [*prediction score* =  
273 0.96]; acceptor score from nucleotide 835 to 875 [*prediction score* = 0.98]) and a polyA tail  
274 following nucleotide 1239. In human, *hsp70* pseudogenes can act as long nc-RNAs. Thus, we  
275 suspected this novel transcript to have similar characteristics. To test this hypothesis, we used a  
276 computational prediction tool [36] to calculate the probability of our novel transcript being a  
277 lncRNA. As control we used the same tool on the *Dt-hsp70* transcript and obtained that *Dt-hsp70* is  
278 classified as a coding transcript with coding probability 1, Fickett score 0.41216, complete putative  
279 ORF of 635 aa in length, and a pI 5.67, in agreement with data shown in Table 2. Strikingly, the

280 novel Hsp70 transcript was classified as a noncoding sequence with coding probability 0.300294,  
281 Fickett score 0.36989, a complete putative ORF of 110 aa, and a pI 8.70.  
282 Next, we wanted to understand if this transcript represents an additional isoform of the hsp70 gene or  
283 an as yet uncharacterized gene. To answer this question we extracted genomic DNA from *D. tonsa*  
284 larvae and probed using primers that include the additional sequence, 404 bp long. The amplification  
285 clearly showed two bands (Figure 2B). The shorter band was about 300 bp long while the longer  
286 band and fainter band was observed at about 700 bp, i.e. the difference in the length is exactly what  
287 we would expect in the case of two genes. This result suggests that these two transcripts are  
288 associated with two different genes in the *D. tonsa* genome. To further prove that this is the case, we  
289 calculated the relative intensity of the two bands, finding the *Dt-hsp70* to be exactly two-fold more  
290 intense than the alternative transcript (Figure 2C). This result suggests that two independent genes  
291 encode these transcripts. Moreover, these genes are represented at different copy number in the  
292 genome as demonstrated by the Gene Copy Number analysis by qPCR (Figure 2C).  
293 Summarizing these results, we found that: i) in addition to the hsp70 gene, *D. tonsa* has a putative  
294 *hsp* pseudogene; ii) this gene encodes at least one transcript containing an insertion with respect to  
295 the *Dt-hsp70*; iii) the transcript has a partial overlap with the full length *Dt-hsp70*; iv) this transcript  
296 is likely a lncRNA. Given these characteristics, we named this gene *Dt-Ps-hsp70*.

297

### 298 *Multi-level analysis of changes in gene expression during thermal stress*

299 To address the question of how *D. tonsa* adapts to thermal stress at the molecular level, we studied  
300 the gene expression changes in *Dt-hsp70*, *hsc70-I*, and *hsc70-II* induced by high temperature (15, 26,  
301 and 32 °C) in mature larvae. We hoped to set up the most complete experimental design to date for  
302 this organism and addressed the question by monitoring changes at the transcriptional, translational,  
303 and protein levels (Figure 3A). We extracted total RNA, polysome-associated RNA, and proteins  
304 from larvae exposed to 15, 26, and 32 °C. We studied all three levels of gene expression in the case

305 of *Dt-hsp70* and the transcriptional and translational level for *Dt-hsp70-I* and *II*.  
306 We found that *Dt-hsp70* and *Dt-hsc70-I* were significantly up regulated at 26 and 32 °C ( $p < 0.001$ ),  
307 while a slight, but still statistically significant, decrease was observed for *Dt-hsc70-II* at 26 °C  
308 (Figure 3B). The most dramatic transcriptional changes were observed for *Dt-hsp70*. A slight but  
309 significant positive change was observed in *Dt-hsc70-I* at 26 and 32 °C. *Dt-hsc70-II* did not change  
310 its recruitment on polysomes (Figure 3C). Interestingly *Dt-hsp70* showed strong variability among  
311 the four thermal stresses, with a decrease in mRNA recruitment at 15 °C ( $p < 0.001$ ) and an increase  
312 at 32 °C ( $p < 0.001$ ) (Figure 3C). Interestingly, at 26 °C, when the transcriptional up-regulation is at  
313 its maximal level (Figure 3B), no changes were observed at the polysomal (i.e. translational) level.  
314 This result suggests that, despite robust transcriptional activation, the protein is likely not produced.  
315 To test this hypothesis, we focused our attention on this transcript and studied the protein level by  
316 Western Blotting from total protein extracts (Figure 3D). GAPDH was used as protein loading  
317 control. HSP70 protein densitometry analysis clearly shows a trend which resembles the observed  
318 translational changes. Next, we compared the changes at all three levels (Figure 3E) and found that  
319 the fold-change profiles of protein and translational level were similar showing very high correlation  
320 ( $R^2 = 0.922$ , Figure 3E, inset). Conversely, the profile of the transcriptional fold-change clearly  
321 differs, with no change at 15 °C and remarkable increase at 26 and 32 °C, and very low correlation  
322 with the translational level ( $R^2 = 0.389$ ; Supplementary Figure 4A).

### 323 324 *Role of Dt-Ps-hsp70 in translational control of HSP70 protein expression*

325 Having shown that at 26 °C of thermal stress there is a strong uncoupling of transcription and  
326 translation/protein level, we wondered whether, similar to observations in mammals during heat  
327 stress [29], the putative lncRNA *Dt-Ps-hsp70* transcript plays a role in attenuating the transcriptional  
328 boost.

329 To test this hypothesis, we studied the changes of *Dt-Ps-hsp70* at both the transcriptional and  
330 translational level by qPCR (Figure 4A and B), using conveniently designed primers (Supplementary  
331 Figure 4B and Table 1). An increase in the expression of *Dt-Ps-hsp70* at transcriptional level was  
332 detected at 26 °C and 32 °C ( $p < 0.001$ ) (Figure 4A), similar to observations of *Dt-hsp70* (Figure  
333 3B).

334 This transcript was uploaded on polysomes, with a positive fold-change with respect to the control,  
335 exclusively at 26 °C (Figure 4B). Next, we calculated the relative variations of translational and  
336 transcriptional changes (Translation Efficiency ( $\Delta TE$ ) in Figure 4C). A statistically significant  
337 increase in the  $\Delta TE$  was observed in larvae stressed at 26 °C ( $p < 0.001$ ) and 32 °C ( $p < 0.05$ ).  
338 Strikingly, the most robust up-regulation was at 26 °C, precisely when we observed the strongest  
339 uncoupling of transcription and translation in *Dt-Ps-hsp70* (Figure 4D).

340 Taken together these results suggest that the *Dt-Ps-hsp70* transcript likely competes with the *Dt-*  
341 *hsp70* transcript for ribosome recruitment, leading to attenuation of the global efficiency of HSP70  
342 production at 26 °C and suggesting that *Dt-Ps-hsp70* acts as a ribosome sponge to modulate the  
343 protein synthesis of HSP70.

344

## 345 **Discussion**

346 The HSR is an important biochemical indicator for assessing levels of thermal stress and thermal  
347 tolerance limits stemming from the fact that protein conformation is a thermally sensitive weak-link  
348 [17]. Thus, species sensitivity inferred from HSR activation might be used as a proxy of their  
349 ecological valency [e.g., 23, 37, 38, 39] and their vulnerability to climate change.

350 Under HS, the cold adapted *D. tonsa* deploys a molecular strategy involving HSR (Figure 5). This  
351 strategy appears more complex than previously considered for larvae of *Diamesa* [13, 22] and other  
352 Diamesinae [22]. One *hsp70* gene (*Dt-hsp70*), one pseudogene *hsp70* (*Dt-Ps-hsp70*) and two  
353 isoforms of *hsc70* (*Dt-hsc70-I* and *Dt-hsc70-II*) have been sequenced in *D. tonsa*, experimentally



354 showing differential expression under increased temperature (15, 26 and 32 °C). This response was  
355 studied here at the transcriptional, translational, and protein level. As expected [22], *D. tonsa* showed  
356 strong activation of transcription of *hsp70* inducible forms (*Dt-hsp70*) at temperatures  $\geq 26$  °C, and,  
357 to a minor extent, also of the cytoplasmic constitutive form (*Dt-hsc70-I*) at both 26 and 32 °C. We  
358 found that *Dt-hsp70* and *Dt-hsc70-I* were significantly up-regulated at 26 and 32 °C, whilst a slight,  
359 still statistically significant decrease was observed for *Dt-hsc70-II* at 26 °C. In accordance with  
360 previous findings by other co-authors [40], the strongest transcriptional changes were observed for  
361 *Dt-hsp70*. Overall, *Dt-hsc70-I* cooperates with *Dt-hsp70* to help *D. tonsa* larvae survive stress.  
362 The presence of more than one member of the *hsc70* family has been previously observed in other  
363 insects. For example, in the mosquito *Culex quinquefasciatus* [41] and the fruit fly *Drosophila*  
364 *melanogaster* [42] the *hsp70* family includes seven heat shock cognate genes (*hsc70-1-7*). These  
365 genes are all expressed during normal growth, but the proteins show different subcellular  
366 localization: *hsc70-x* localizes to mitochondria, *hsc70-3* to the endoplasmic reticulum (ER) and the  
367 others either to the cytoplasm or the nucleus [43]. Phylogenetic analysis suggests that the cDNA  
368 sequences of *Dt-hsp70* and *Dt-hsc70-I* are more similar to those obtained from other Chironomidae  
369 than to other Diptera families. Conversely *Dt-hsc70-II* clusters with the *hsc70* of *Aedes aegypti*  
370 (Culicidae) and *hsc70-3* of *D. melanogaster* (Drosophilidae). This is probably due to the different  
371 subcellular localization of this *hsc70* member: *hsc70* of *Aedes aegypti* and *hsc70-3* of *D.*  
372 *melanogaster* correspond to proteins localized in the ER and both presented the Hsp70 C-terminal  
373 ER localization signal (KDEL) [43, 44] as does *Dt-hsc70-II*.  
374 The discovery of a putative *hsp* pseudogene that encodes for at least one transcript containing an  
375 intron with respect to the *Dt-hsp70*, and its prediction as a lncRNA, is a very intriguing finding. *Dt-*  
376 *hsp70*, which is an inducible *Hsp70* gene, is intron-less as is typical in most organisms. As such, it  
377 does not require splicing for normal function [40, 45]. The lack of introns enables the transcribed  
378 mRNAs to move rapidly from the nucleus to the cytoplasm without splicing, significantly



379 accelerating the HSR. Notably, splicing machinery is usually strongly inhibited by HS and other  
380 stressors. This fact may favour the selection of intron-less copies of *hsp* genes in the course of  
381 evolution [46, 47]. Introns have been considered to appear more frequently in cognate isoforms  
382 expressed at normal temperatures [48]. There are, however, several exceptions to this rule, such as in  
383 several species of fungi [49, 50], plants [51, 52], the nematode *Caenorhabditis elegans* [53], and in  
384 the grasshopper *Locusta migratoria* [54]. Interestingly, in these organisms, *hsp70* genes with introns  
385 were constitutively expressed [54]. Specifically, in *C. elegans*, with intron-exon arrangement of *hsp*  
386 genes, the splicing of *Hsp70* mRNA occurs with maximal efficiency after moderate HS while  
387 splicing of “normal” cellular genes, such as tubulin, is concomitantly blocked by a still unknown  
388 mechanism [55].

389 As has been reported for long noncoding RNAs of mammals [56], the *Dt-Ps-hsp70* transcript was  
390 uploaded on polysomes with a positive fold-change exclusively at 26 °C. Strikingly, the most robust  
391 up-regulation was at 26 °C, precisely when we observed the strong uncoupling of transcription and  
392 translation for the pseudogene. The fact that *Dt-Ps-hsp70* shares with *Dt-hsp70* the first half of the  
393 sequence leads us to propose a possible mechanism to explain the transcriptional/translational  
394 uncoupling and low protein production of HSP70 at 26 °C. Having the same 5' sequence, it is  
395 reasonable that both transcripts have very similar probability of translation initiation events. This  
396 means that *Dt-Ps-hsp70* transcript can compete with the *Dt-hsp70* transcript for ribosome  
397 engagement. This condition can control the global efficiency of HSP70 production at 26 °C,  
398 suggesting that *Dt-Ps-hsp70* acts as a ribosome sponge and translational modulator of HSP70 protein  
399 levels. The uncoupling of transcription and translation can be explained by the consideration that,  
400 while important in facilitating tolerance of heat stress, the synthesis of HSPs has considerable  
401 metabolic costs, and it is activated only when essential for survival, otherwise it might be  
402 maladaptive [17]. Translation is known to drain more cellular energy than transcription [57]. The  
403 synthesis of HSPs, and their function as ATP-consuming chaperones in protein folding reactions, can

404 add considerably to the ATP demands of the cell, explaining the repression of basal transcription and  
405 translation [21]. Furthermore, our findings emphasize that transcription alone is not necessarily a  
406 reliable final readout of HSR in *D. tonsa*.

407 Consistent with our results, unspliced mRNAs are uploaded on polysomes for translation, resulting in  
408 the production of a pool of abnormal (truncated) Hsp70 proteins [58]. This finding emphasized that  
409 in this chironomid, as in many organisms from yeast [46, 49] and plants [52] to humans [59],  
410 exposure to heat does affect the spliceosome and hinders intron splicing .

411 The lncRNA discovered in *D. tonsa* is employed as a means of gene regulation and control of HSP70  
412 synthesis under warming stress, as typically observed in higher eukaryotes, predicted by Jacob and  
413 Monod 58 years ago [60] and demonstrated in mammals [29].

414 Recently, great attention has been paid to lncRNAs that should not act as protein-coding transcripts  
415 but are still found associated with polysomes for largely unknown function [61]. The literature  
416 suggests that the majority of the genomes of mammals and other complex organisms is in fact  
417 transcribed into lncRNAs (including those derived from introns), many of which are alternatively  
418 spliced and/or processed into smaller products [61]. At present, there are no clues about the  
419 involvement of lncRNAs in cold stenothermal organisms that are facing global warming challenges  
420 in the wild, such as *D. tonsa*. In this species, the gene encoding the lncRNA was preserved in the  
421 genome but is never expressed under natural conditions.

422 Our findings highlight for the first time the existence and the putative function of a lncRNA in HSR  
423 in a cold stenothermal insect. Why was an *hsp70* pseudogene positively selected by evolutionary  
424 driving forces? An attractive hypothesis is that the presence of inducible intron-isoforms could  
425 reflect an evolutionary strategy and adaptation to survive heat shock in cold adapted organisms,  
426 living constantly in cold waters [62]. Future experiments will be necessary to test this.

427

428 **Acknowledgements**

429 We thank Alessandra Franceschini and Francesca Paoli (MUSE-Museo delle Scienze of Trento) for  
430 animal collection.

431

#### 432 **Competing interests**

433 The authors declare no competing or financial interests.

434

#### 435 **Author contributions**

436 Conceptualization: V.L.; Formal analysis: P.B.; Investigation: P.B. and V.L.; Supervision V.L. and  
437 G.V.; Writing—Original Draft Preparation: P.B.; Writing—Review and Editing: V.L. and G.V.

438

439 **References**

- 440 1. Jeremias G, Barbosa J, Marques SM, Asselman J, Gonçalves FJM, Pereira JL. Synthesizing the  
441 role of epigenetics in the response and adaptation of species to climate change in freshwater  
442 ecosystems. *Mol Ecol*. 2018;27(13):2790-2806. <https://doi.org/10.1111/mec.14727>
- 443 2. Woodward G, Perkins DM, Brown LE. Climate change and freshwater ecosystems: Impacts across  
444 multiple levels of organization. *Philos Trans R Soc Lond B Biol Sci*. 2010;365(1549):2093-2106.  
445 <https://doi.org/10.1098/rstb.2010.0055>
- 446 3. Lencioni V, Spitale D. Diversity and distribution of benthic and hyporheic fauna in different  
447 stream types on an alpine glacial floodplain. *Hydrobiologia*. 2015;751:73-87.  
448 <https://doi.org/10.1007/s10750-014-2172-2>
- 449 4. Hotaling S, Finn DS, Joseph Giersch J, Weisrock DW, Jacobsen D. Climate change and alpine  
450 stream biology: progress, challenges, and opportunities for the future. *Biol Rev Camb Philos Soc*.  
451 2017;92:2024-2045. <https://doi.org/10.1111/brv.12319>
- 452 5. Milner AM, Khamis K, Battin TJ, Brittain JE, Barrand NE, Fuehrer L et al. Glacier shrinkage  
453 driving global changes in downstream systems. *Proc Natl Acad Sci U S A*. 2017;114(37):9770-  
454 9778. <https://doi.org/10.1073/pnas.1619807114>
- 455 6. Brown L, Khamis K, Wilkes M, Blaen P, Brittain J, Carrivick J, et al. Globally consistent  
456 responses of invertebrates to environmental change. *Nat Ecol Evol* 2018;2(2):325-333.  
457 <https://doi.org/10.1038/s41559-017-0426-x>
- 458 7. Pallarés S, Millán A, Mirón JM, Velasco J, Sánchez-Fernández D, Botella-Cruz M et al. Assessing  
459 the capacity of endemic alpine water beetles to face climate change. *Insect Conserv Divers*. 2019.  
460 <https://doi.org/10.1111/icad.12394>
- 461 8. Lencioni V. Glacial influence and macroinvertebrate biodiversity under climate change: lessons  
462 from the Southern Alps. *Sci Total Environ*. 2018;622-623:563-575.  
463 <https://doi.org/10.1016/j.scitotenv.2017.11.266>
- 464 9. Wang Q, Fan X, Wang M. Recent warming amplification over high elevation regions across the

- 465 globe. *Clim Dyn.* 2014;43:87-101. <https://doi.org/10.1007/s00382-013-1889-3>
- 466 10. Lencioni V, Bernabò P. Thermal survival limits of young and mature larvae of a cold  
467 stenothermal chironomid from the Alps (Diamesinae: *Pseudodiamesa branickii* [Nowicki, 1873]).  
468 *Insect Sci.* 2017;24(2):314-324. <https://doi.org/10.1111/1744-7917.12278>
- 469 11. Montagna M, Mereghetti V, Lencioni V, Rossaro B. Integrated Taxonomy and DNA Barcoding  
470 of Alpine Midges (Diptera: Chironomidae). *PLoS One.* 2016;11(7):e0159124. [https://doi.org/](https://doi.org/10.1371/journal.pone.0149673)  
471 [10.1371/journal.pone.0149673](https://doi.org/10.1371/journal.pone.0149673)
- 472 12. Lencioni V, Bernabò P, Jousson O, Guella G. Cold adaptive potential of chironomids  
473 overwintering in a glacial stream. *Physiol Entomol.* 2015;40:43-53.  
474 <https://doi.org/10.1111/phen.12084>
- 475 13. Lencioni V, Bernabò P, Cesari M, Rebecchi L. Thermal stress induces hsp70 proteins synthesis  
476 in larvae of the cold stream non-biting midge *Diamesa cinerella* Meigen. *Arch Insect Biochem*  
477 *Physiol.* 2013;83:1-14. <https://doi.org/10.1002/arch.21088>
- 478 14. Feder ME, Hofmann GE. Heat-shock proteins, molecular chaperones, and the stress response:  
479 evolutionary and ecological physiology. *Annu Rev Physiol.* 1999;61:243-82.  
480 <https://doi.org/10.1146/annurev.physiol.61.1.243>
- 481 15. Morimoto RI, Kline MP, Bimston DN, Cotto JJ. The heat-shock response: regulation and  
482 function of heat-shock proteins and molecular chaperones. *Essays Biochem.* 1997;32:17-29.
- 483 16. Glickman MH, Ciechanover A. The ubiquitin-proteasome proteolytic pathway: destruction for  
484 the sake of construction. *Physiol Rev.* 2002;82:373-428.  
485 <https://doi.org/10.1152/physrev.00027.2001>
- 486 17. Tomanek L. Variation in the heat shock response and its implication for predicting the effect of  
487 global climate change on species' biogeographical distribution ranges and metabolic costs. *J Exp*  
488 *Biol.* 2010;213:971-979. <https://doi.org/10.1242/jeb.038034>.
- 489 18. Lindquist S, Craig E. The Heat-Shock Proteins. *Annu Rev Genet.* 1988;22:631-677.

- 490 <https://doi.org/10.1146/annurev.ge.22.120188.003215>
- 491 19. Hartl FU, Hayer-Hartl M. Molecular chaperones in the cytosol: from nascent chain to folded  
492 protein. *Science*. 2002;295:1852-1858. <https://doi.org/10.1126/science.1068408>
- 493 20. Gupta RS, Golding GB. Evolution of HSP70 gene and its implications regarding relationships  
494 between archaeobacteria, eubacteria, and eukaryotes. *J Mol Evol*. 1993;37(6):573-82.  
495 <https://doi.org/10.1007/bf00182743>
- 496 21. Chen B, Feder M E, Kang L. Evolution of heat-shock protein expression underlying adaptive  
497 responses to environmental stress. *Mol Ecol*. 2018;27:3040-3054.  
498 <https://doi.org/10.1111/mec.14769>
- 499 22. Bernabò P, Jousson O, Latella L, Martínez-Guitarte JL, Rebecchi L, Lencioni V. Comparative  
500 analysis of Heat shock proteins and thermoresistance in stenothermal insects from caves and cold  
501 streams (NE, Italy). *Comp Biochem Physiol A Mol Integr Physiol*. 2009;154:S4.  
502 <https://doi.org/10.1016/j.cbpa.2009.05.023>.
- 503 23. Rinehart JP, Hayward SAL, Elnitsky MA, Sandro LH, Lee RE, Denlinger DL. Continuous up-  
504 regulation of heat shock proteins in larvae, but not adults, of a polar insect. *Proc Natl Acad Sci U*  
505 *S A*. 2006;103:14223-14227. <https://doi.org/10.1073/pnas.0606840103>
- 506 24. Bernabò P, Rebecchi L, Jousson O, Martínez-Guitarte JL, Lencioni V. Thermotolerance and  
507 hsp70 HSR in the cold-stenothermal chironomid *Pseudodiamesa branickii* (NE Italy). *Cell Stress*  
508 *Chaperones*. 2011;16:403-410. <https://doi.org/10.1007/s12192-010-0251-5>
- 509 25. Tebaldi T, Re A, Viero G, Pegoretti I, Passerini A, Blanzieri E, Quattrone A. Widespread  
510 uncoupling between transcriptome and translome variations after a stimulus in mammalian cells.  
511 *BMC Genomics*. 2012;13:220. <https://doi.org/10.1186/1471-2164-13-220>
- 512 26. Bernabò P, Lunelli L, Quattrone A, Jousson O, Lencioni V, Viero G. Studying translational  
513 control in non-model stressed organisms by polysomal profiling. *J Insect Physiol*. 2015;76:30–35.  
514 <https://doi.org/10.1016/j.jinsphys.2015.03.011>

- 515 27. Schwanhauser B, Busse D, Li N, Dittmar G, Schuchhardt J, Wolf J et al. Global quantification  
516 of mammalian gene expression control. *Nature*. 2011;473:337-342.  
517 <https://doi.org/10.1038/nature10098>
- 518 28. Vogel C, De Sousa Abreu R, Ko D, Le SY, Shapiro BA, Burns SC et al. Sequence signatures and  
519 mRNA concentration can explain two-thirds of protein abundance variation in a human cell line.  
520 *Mol Syst Biol*. 2010;6:400. <https://doi.org/10.1038/msb.2010.59>
- 521 29. Place RF, Noonan EJ. Non-coding RNAs turn up the heat: An emerging layer of novel regulators  
522 in the mammalian heat shock response. *Cell Stress Chaperones*. 2014;19(2):159–172.  
523 <https://doi.org/10.1007/s12192-013-0456-5>
- 524 30. Rossaro B, Lencioni V. A key to larvae of species belonging to the genus *Diamesa* from Alps  
525 and Apennines (Italy). *Eur J Environ Sci*. 2015;5(1):62-79.  
526 <https://doi.org/10.14712/23361964.2015.79>
- 527 31. Dereeper A, Guignon V, Blanc G. Phylogeny.fr: robust phylogenetic analysis for the non-  
528 specialist. *Nucleic acids Res* 2008;36:W465-W469. <https://doi.org/10.1093/nar/gkn180>
- 529 32. Schmittgen TD, Livak KJ. Analyzing real-time PCR data by the comparative CT method. *Nat*  
530 *Protoc*. 2008;3:1101-1108. <https://doi.org/10.1038/nprot.2008.73>
- 531 33. Wessel D, Flügge UI. A method for the quantitative recovery of protein in dilute solution in the  
532 presence of detergents and lipids. *Anal Biochem*. 1984;138:141-143.  
533 [https://doi.org/10.1016/0003-2697\(84\)90782-6](https://doi.org/10.1016/0003-2697(84)90782-6)
- 534 34. Friederich M, Tautz D. Evolution and phylogeny of the Diptera: a molecular phylogenetic  
535 analysis using 28S rDNA sequences. *Syst Biol*. 1997;46(4):674-698.  
536 <https://10.1093/sysbio/46.4.674>
- 537 35. Oesterbroek FLS, Courtney G. Phylogeny of the nematoceros families of Diptera (Insecta). *Zool*  
538 *J Linn Soc*. 1995;115:267-311. <https://10.1111/j.1096-3642.1995.tb02462.x>
- 539 36. Kang Y-J, Yang D-C, Kong L, Hou M, Meng Y-Q, Wei Let al. CPC2: a fast and accurate coding

- 540 potential calculator based on sequence intrinsic features. *Nucleic Acids Res.* 2017;45(W1):W12-  
541 W16. <https://doi.org/10.1093/nar/gkx428>
- 542 37. Bosch, TC, Krylow, SM, Bode, HR, Steele, RE. Thermotolerance and synthesis of heat shock  
543 proteins: these responses are present in *Hydra attenuata* but absent in *Hydra oligactis*. *Proc Natl*  
544 *Acad Sci U S A.* 1988;85:7927-7931. <https://doi.org/10.1073/pnas.85.21.7927>
- 545 38. Hofmann GE, Lund SG, Place SP, Whitmer AC. Some like it hot, some like it cold: The HSR is  
546 found in New Zealand but not Antarctic notothenioid fishes. *J Exp Mar Bio Ecol.* 2005;316: 79-  
547 89. <https://doi.org/10.1016/j.jembe.2004.10.007>
- 548 39. Clark MS, Fraser KPP, Peck LS. Lack of an HSP70 HSR in two Antarctic marine invertebrates.  
549 *Polar Biol.* 2008;31:1059-1065. <https://doi.org/10.1007/s00300-008-0447-7>
- 550 40. Lindquist S. The Heat-Shock Response. *Annu Rev Biochem.* 1986;55:1151-1191.  
551 <https://doi.org/10.1146/annurev.bi.55.070186.005443>
- 552 41. Nguyen AD, Gotelli NJ, Cahan SH. The evolution of heat shock protein sequences, cis-  
553 regulatory elements, and expression profiles in the eusocial Hymenoptera. *BMC Evol Biol.*  
554 2016;16:15. <https://doi.org/10.1186/s12862-015-0573-0>
- 555 42. Perkins LA, Doctor JS, Zhang K, Stinson L, Perrimon N, Craig EA. Molecular and  
556 developmental characterization of the heat shock cognate 4 gene of *Drosophila melanogaster*. *Mol*  
557 *Cell Biol.* 1990;10:3232-3238. <https://doi.org/10.1128/MCB.10.6.3232>
- 558 43. Rubin DM, Mehta AD, Zhu J, Shoham S, Chen X, Wells QR et al. Genomic structure and  
559 sequence analysis of *Drosophila melanogaster* HSC70 genes. *Gene.* 1993;128:155-163.  
560 [https://doi.org/10.1016/0378-1119\(93\)90558-k](https://doi.org/10.1016/0378-1119(93)90558-k)
- 561 44. Ribeiro JMC, Arcà B, Lombardo F, Calvo E, Phan VM, Chandra PK et al. An annotated  
562 catalogue of salivary gland transcripts in the adult female mosquito, *Aedes aegypti*. *BMC*  
563 *Genomics.* 2007;8:6. <https://doi.org/10.1186/1471-2164-8-6>
- 564 45. Kapoor M, Curle CA, Runham C. The hsp70 gene family of *Neurospora crassa*: Cloning,



- 565 sequence analysis, expression, and genetic mapping of the major stress-inducible member. J  
566 Bacteriol. 1995;177:212-221. <https://doi.org/10.1128/jb.177.1.212-221.1995>
- 567 46. Yost HJ, Lindquist S. Heat shock proteins affect RNA processing during the HSR of  
568 *Saccharomyces cerevisiae*. Mol Cell Biol. 1991;11:1062-1068.  
569 <https://doi.org/10.1128/mcb.11.2.1062>
- 570 47. Evgen'ev MB, Garbuz DG, Zatsepina OG. Heat shock proteins and whole body adaptation to  
571 extreme environments. Dordrecht Heidelberg New York London: Springer; 2014  
572 <http://dx.doi.org/10.14712/23361964.2015.79>
- 573 48. Stefani RMP, Gomes SL. A unique intron-containing hsp70 gene induced by heat shock and  
574 during sporulation in the aquatic fungus *Blastocladiella emersonii*. Gene. 1995;152:19-26.  
575 [https://doi.org/10.1016/0378-1119\(95\)00645-M](https://doi.org/10.1016/0378-1119(95)00645-M)
- 576 49. Georg RC, Stefani RM, Gomes SL. Environmental stresses inhibit splicing in the aquatic fungus  
577 *Blastocladiella emersonii*. BMC Microbiol. 2009;9:231. <https://doi.org/10.1186/1471-2180-9-231>
- 578 50. Kummasook A, Pongpom P, Vanittanakom N. Cloning, characterization and differential  
579 expression of an hsp70 gene from the pathogenic dimorphic fungus, *Penicillium marneffeii*. DNA  
580 Seq. 2007;18:385-394. <https://doi.org/10.1080/10425170701309012>
- 581 51. Rochester DE, Winer JA, Shah DM. The structure and expression of maize genes encoding the  
582 major heat shock protein, hsp70. EMBO J. 1986; 5:451-458.
- 583 52. Winter J, Wright R, Duck N, Gasser C, Fraley R, Shah D. The inhibition of petunia hsp70 mRNA  
584 processing during CdCl<sub>2</sub> stress. Mol Gen Genet. 1988;211(2):315-319.  
585 <https://doi.org/10.1007/BF00330609>
- 586 53. Snutch TP, Heschl MF, Baillie DL. The *Caenorhabditis elegans* hsp70 gene family: a molecular  
587 genetic characterization. Gene. 1988; 64(2):241-55. [https://doi.org/10.1016/0378-1119\(88\)90339-](https://doi.org/10.1016/0378-1119(88)90339-3)  
588 3
- 589 54. Qin W, Tyshenko MG, Wu BS, Walker VK, Robertson RM. Cloning and characterization of a

- 590 member of the Hsp70 gene family from *Locusta migratoria*, a highly thermotolerant insect. Cell  
591 Stress Chaperones. 2003;8:144-152. [https://doi.org/10.1379/1466-](https://doi.org/10.1379/1466-1268(2003)008<0144:cacoam>2.0.co;2)  
592 [1268\(2003\)008<0144:cacoam>2.0.co;2](https://doi.org/10.1379/1466-1268(2003)008<0144:cacoam>2.0.co;2)
- 593 55. Huang J, Van der Ploeg. Maturation of polycistronic pre-mRNA in *Trypanosoma brucei*: analysis  
594 of trans splicing and poly(A) addition at nascent RNA Transcripts from the *hsp70* locus. Mol Cell  
595 Biol. 1991;11(6):3180-90. <https://doi.org/10.1128/mcb.11.6.3180>
- 596 56. Ingolia NT, Lareau LF, Weissman JS. Ribosome profiling of mouse embryonic stem cells reveals  
597 the complexity and dynamics of mammalian proteomes. Cell. 2011;147, 789-802.  
598 <https://doi.org/10.1016/j.cell.2011.10.002>.
- 599 57. Holcik M, Sonenberg N. Translational control in stress and apoptosis. Nat Rev Mol Cell Biol.  
600 2005 6:318-327. <https://doi.org/10.1038/nrm1618>
- 601 58. Yost HJ, Lindquist S. Translation of unspliced transcripts after heat shock. Science.  
602 1988;242:1544–1548. <https://doi.org/10.1126/science.3201243>
- 603 59. Bond U, James TC. Dynamic changes in small nuclear ribonucleoproteins of heat-stressed and  
604 thermotolerant HeLa cells. Int J Biochem Cell Biol. 2000;32:643-656.  
605 [https://doi.org/10.1016/S1357-2725\(00\)00008-X](https://doi.org/10.1016/S1357-2725(00)00008-X)
- 606 60. Jacob F, Monod J. Genetic regulatory mechanisms in the synthesis of proteins. J Mol Biol.  
607 1961;3:318-356. [https://doi.org/10.1016/S0022-2836\(61\)80072-7](https://doi.org/10.1016/S0022-2836(61)80072-7)
- 608 61. Mattick JS, Makunin IV. Non-coding RNA, Human Molecular Genetics. Hum Mol Genet. 2006;  
609 15(1):R17–R29. <https://doi.org/10.1093/hmg/ddl046>
- 610 62. Knigge T, Bachmann L, Köhler H-R. An intron-containing, heat-inducible stress-70 gene in the  
611 millipede *Tachypodoiulus niger* (Julidae, Diplopoda). Cell Stress Chaperones. 2014;19:741-747.  
612 <https://doi.org/10.1007/s12192-014-0494-7>

613

614



631 settings. The numbers above the branches are tree supported values generated by PhyML using  
632 the approximate Likelihood-Ratio (aLRT) statistical test.  
633

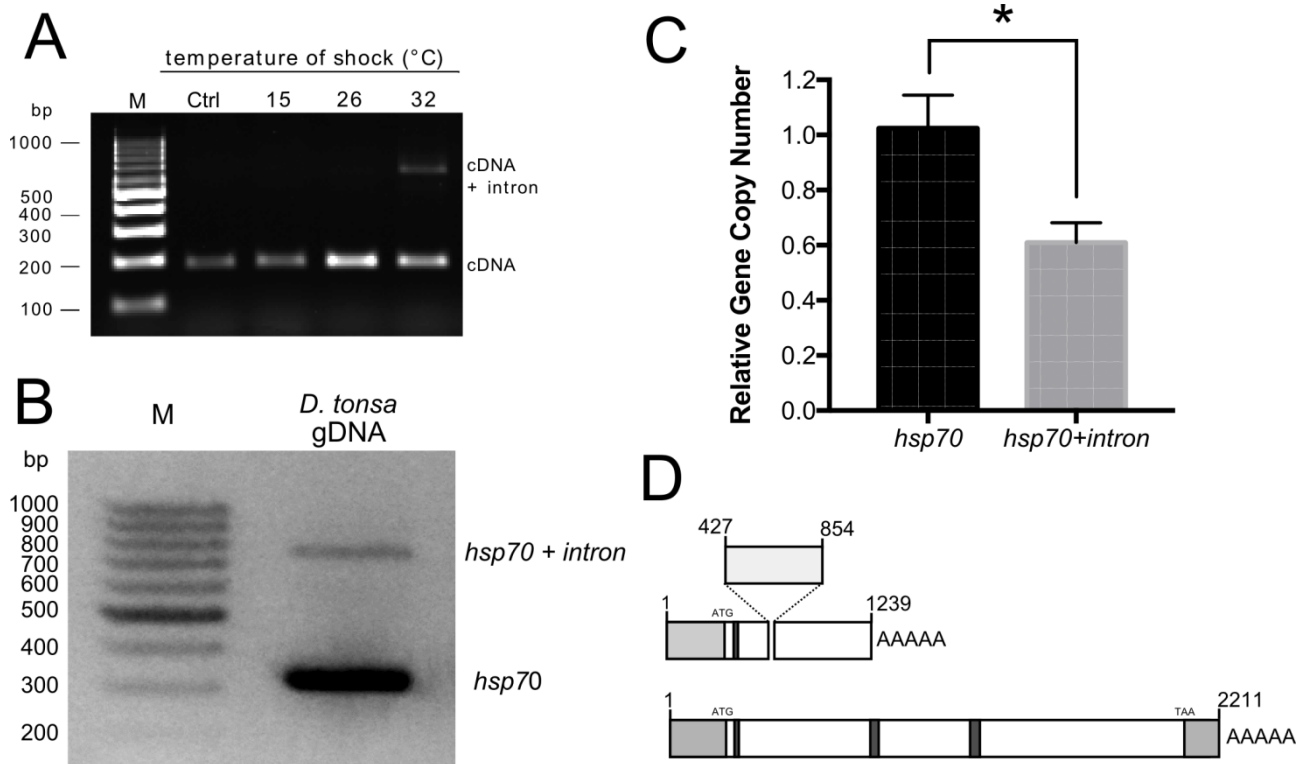

634

635

636

637

638

639

640

641

642

643

644

645

**Figure 2. Identification of an Hsp70 pseudogene in *Diamesa tonsa*** (A) Agarose gel of *hsp70* PCR products from *D. tonsa* larvae control (Ctrl, 4°C) or maintained for 1 h at 15, 26, and 32°C. All PCR products are amplified from cDNA with primers for *hsp70* (Table 1). (B) Agarose gel electrophoresis of the PCR products amplified from *D. tonsa* genomic DNA with *hsp70* sequence specific primers *hsp70* F and *hsp70* R (Table 2). (C) Relative gene copy number of *hsp70* and *hsp70 + intron* assessed by Real-PCR analysis (n = 4) (Student *t*-test, \*  $p \leq 0.05$ ). (D) Schematic representation of the two *hsp70* transcripts: light grey boxes are the 5' and 3' UTR, dark grey boxes indicated the position of the three characteristic HSP70 family domains.

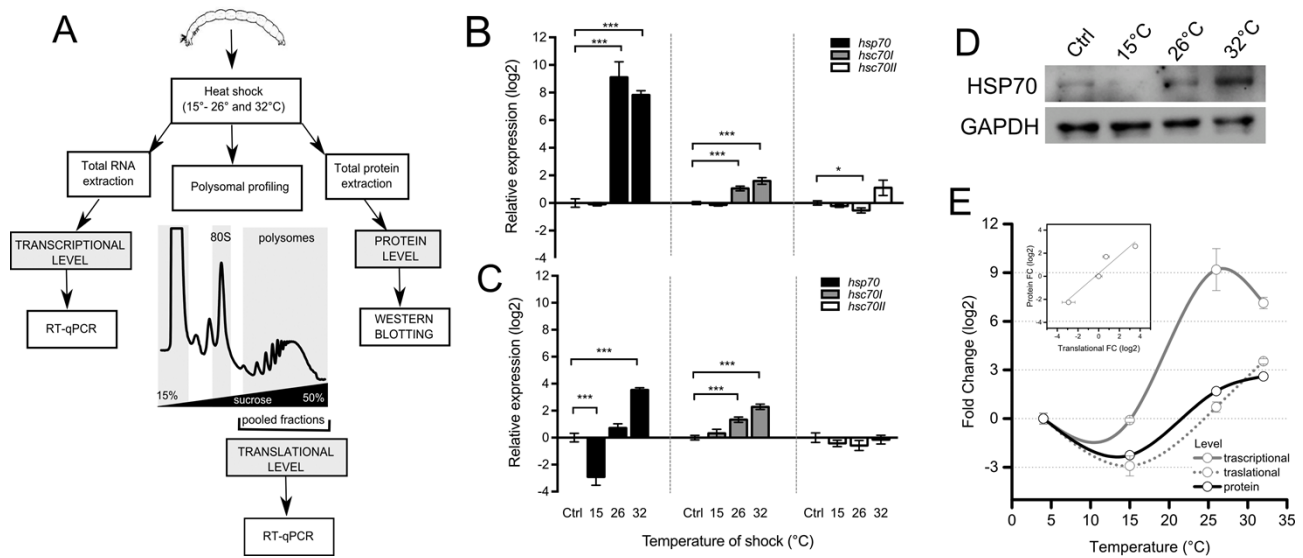

646

647

648 **Figure 3. Multi-level analysis of gene expression of *Dc-hsp70*, *hsc70-I* and *hsc70-II* during**

649 **thermal stress. (A)** Experimental design for comparing changes in gene expression at multiple levels.

650 Insects were exposed to thermal stress. Total RNA was extracted to analyse the changes at

651 transcriptional level. In parallel, changes associated with mRNA recruitment to polysomes was

652 obtained by RNA extraction from polysomal fractions. These were collected after polysomal profiling

653 to assess the translational changes in gene expression. Finally, whole proteins were extracted to assess

654 protein level. In the first two cases, all three transcripts were studied. For the protein level, only Hsp70

655 was monitored. **(B)** Transcriptional expression level for *hsp70*, *hsc70-I* and *hsc70-II*. Total RNA was

656 extracted from *Diamesa tonsa* larvae control (Ctrl, 4°C) or maintained for 1 h at 15, 26, and 32°C.

657 *hsp70*, *hsc70-I* and *hsc70-II* relative expression levels were measured by real-time PCR. *Actin* was

658 used as housekeeping gene and the level of control (Ctrl, 4°C) was set at 0. Error bars represent SE; n =

659 3 biological replicates and each assay was performed in triplicate. **(C)** Translational expression level

660 for *hsp70*, *hsc70-I* and *hsc70-II*. Polysomal RNA was extracted from sucrose fractions corresponding

661 to the polysomal peaks of larvae control (4°C) or maintained for 1 h at 15, 26, and 32°C. *hsp70*, *hsc70-I*

662 and *hsc70-II* relative expression levels were measured by real-time PCR. *Actin* was used as

663 housekeeping gene and the level of control (4°C) was set at 0. **(D)** Western blot analysis of HSP70

664 protein level in larvae control (Ctrl, 4°C) or maintained for 1 h at 15, 26, and 32°C. GAPDH was used  
665 as a loading control. (E) Comparison of the log<sub>2</sub> Fold Change with respect to Ctrl of Transcriptional,  
666 Translational and Protein level after exposure to 15, 26 and 32°C. Asterisks indicate statistically  
667 significant differences with respect to control (Student *t*-test, \*  $p \leq 0.05$ , \*\*  $p \leq 0.01$ , \*\*\*  $p \leq 0.001$ ).  
668 In the inset, the correlation between fold changes occurring at the translational and protein level was  
669 calculated ( $R^2=0.922$ ). In the case of transcriptional and translational comparison, the correlation was  
670 ( $R^2=0.389$ ), see Figure S3A.

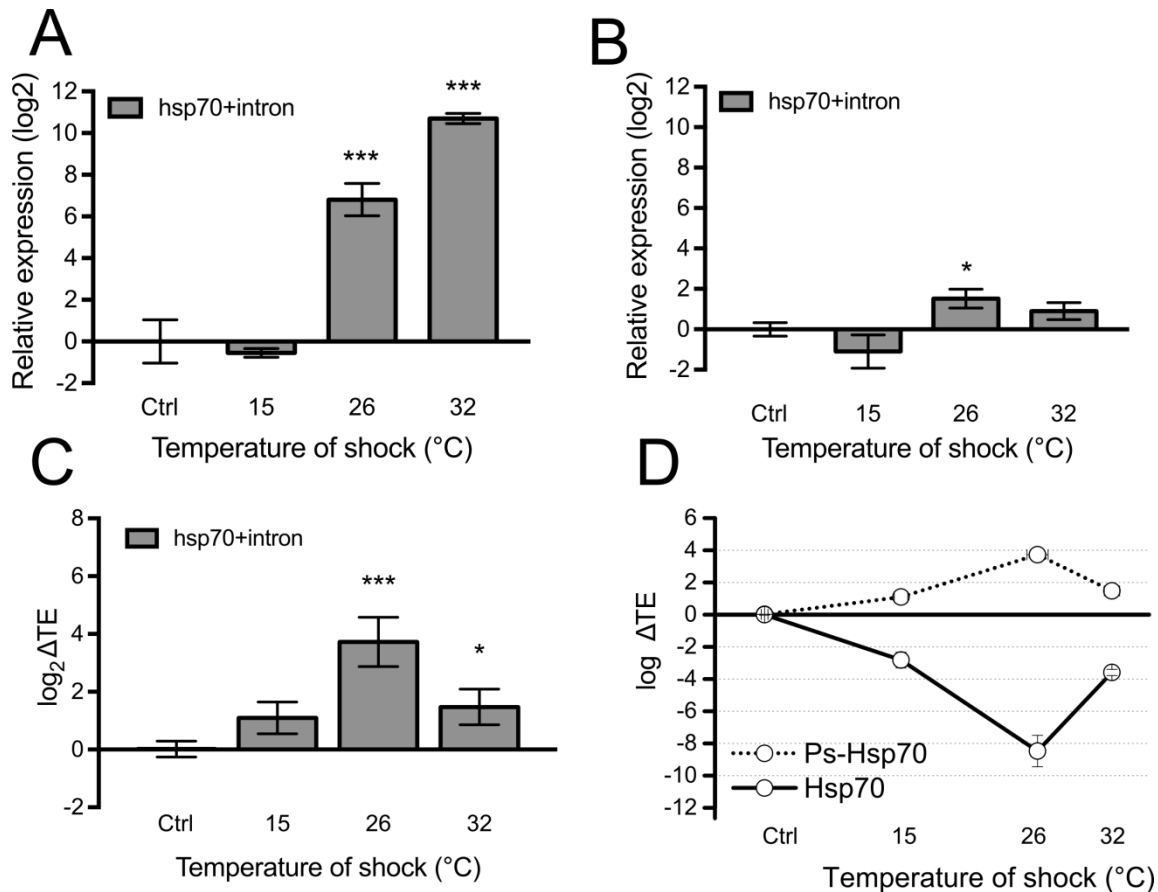

671

672 **Figure 4 Ps-Hsp70 is loaded on polysomes and acts as a putative ribosome sponge for Hsp70 (A)**

673 Transcriptional expression level for *hsp70 + intron* mRNA. Total RNA was extracted from *Diamesa*  
 674 *tonsa* larvae control (K, 4 °C) or maintained for 1 h at 15, 26, and 32 °C. Relative expression level was  
 675 measured by real-time PCR. *Actin* was used as housekeeping gene and the level of control (Ctrl, 4 °C)  
 676 was set at 0. Error bars represent SE; n = 3 biological replicates and each assay performed in triplicate.

677 **(B)** Translational expression level of *hsp70 + intron*. Polysomal RNA was extracted from sucrose  
 678 fractions corresponding to the polysomal peaks of larvae control (4 °C) or maintained for 1 h at 15, 26,  
 679 and 32 °C. Relative expression level was measured by real-time PCR. *Actin* was used as housekeeping

680 gene and the level of control (4 °C) was set at 0. **(C)** Translation Efficiency (log<sub>2</sub> ΔTE), calculated as  
 681 the difference between the fold change at the polysomal level and the fold change at the sub-polysomal  
 682 level, of *hsp70 + intron* in larvae control (Ctrl, 4 °C) or maintained for 1 h at 15, 26, and 32°C.

683 Asterisks indicate statistically significant differences in respect to the control (Student *t*-test, \* *p* ≤  
 684 0.05, \*\* *p* ≤ 0.01, \*\*\* *p* ≤ 0.001). **(D)** Comparison between the Translation Efficiency (log<sub>2</sub> ΔTE) of



685 Ps-Hsp70 and Hsp70. The  $\Delta$ TE values for Hsp70 were obtained from data shown in Figure 3B and C.

686

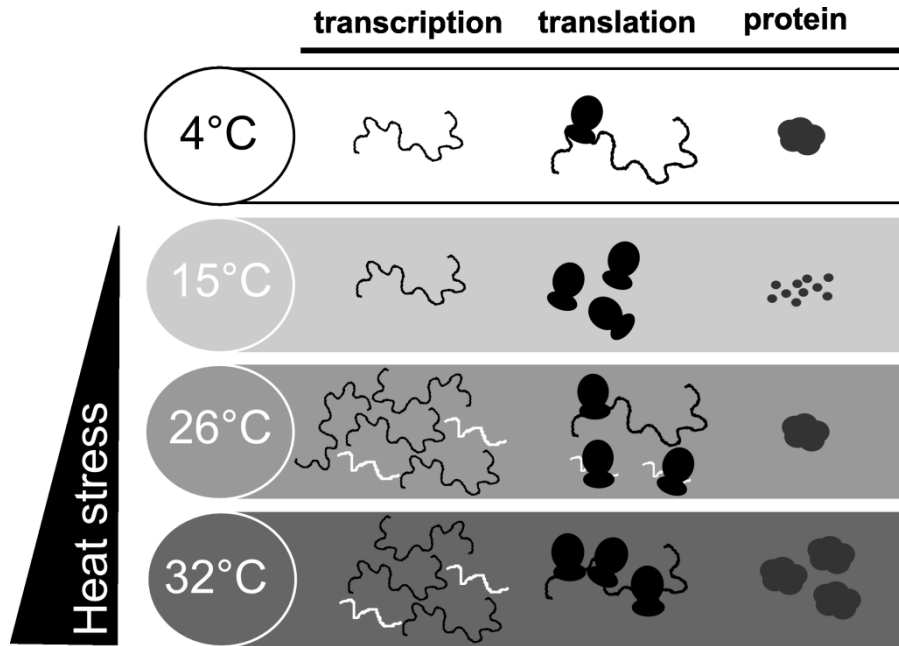

687

688

689 **Figure 5.** Scheme summarizing the multi-level changes occurring during heat shock in *Diamesa tonsa*.

690

691

692

693 **Table 1.** List of primers (5' -3' ) used to amplify *hsp70* with and without intron, *hsc70-I*, *hsc70-II*,  
 694 and *actin* in RT-PCR analysis.

| <i>Primer</i>     | <i>Application</i>               | <i>Sequence (5' – 3')</i>        |
|-------------------|----------------------------------|----------------------------------|
| Deg_Hsp70-F       | 5'-3' RACE PCR                   | ACVGNTCCNGCNTAYTTYAAAYGA         |
| Deg_Hsp70-R       | 5'-3' RACE PCR                   | GCNACNGCYTCRTCNGGRRTT            |
| GSP-HSP70_F       | 5' RACE PCR                      | TGATGCAAAGCGGCTGATTGGACGTA       |
| GSP-HSp70_R       | 3' RACE PCR                      | TTGGCAGCATCTCCAATTAATCTTTCTGTATC |
| GSP-HSC70I_F      | 5' RACE PCR                      | GTCGTAAATTCGATGACCCC             |
| GSP-HSC70I_R      | 3' RACE PCR                      | GACATTACGTTCTCCAGCAG             |
| GSP-HSC70II_F     | 5' RACE PCR                      | GTTTGATCGGTCGTGAATGGAG           |
| GSP-HSC70II_R     | 3' RACE PCR                      | CCCAAATGTGTGTCACCGTTT            |
| Hsp70 Forward     | Expression (Fig. 4A)             | TTGGGAACAACATATTCCTGC            |
| Hsp70 Reverse     | Expression (Fig. 4A)             | TTCGTTTAGCATCAAAGACACTG          |
| Hsc70I Forward    | qPCR (Fig. 3A/B/C)               | GTCGTAAATTCGATGACCCC             |
| Hsc70I Reverse    | qPCR (Fig. 3A/B/C)               | GACATTACGTTCTCCAGCAG             |
| Hsc70II Forward   | qPCR (Fig. 3A/B/C)               | GTTTGATCGGTCGTGAATGGAG           |
| Hsc70II Reverse   | qPCR (Fig. 3A/B/C)               | CCCAAATGTGTGTCACCGTTT            |
| Intron F          | qPCR (Fig 4C); CNV (Fig. 5B)     | ATGGAGACGCCCAAGAATAA             |
| Intron R          | qPCR (Fig 4C); CNV (Fig. 5B)     | GTTTTTCTATATCATTTCGCACTC         |
| Hsp70 tot F       | qPCR (Fig. 3A/B/C; Fig 4C)       | TGTTGGAGTTTATCAACATGGA           |
| Hsp70 tot R       | qPCR (Fig. 3A/B/C; Fig 4C)       | TTTGGCAGCATCTCCAATTA             |
| Hsp70 no intron F | CNV (Fig. 5B)                    | CAAAAATCAGGTGGCGATGAAT           |
| Hsp70 no intron R | CNV (Fig. 5B)                    | TGAACTGACTTCTTCTGGAGC            |
| Hsp70 genomic F   | gDNA amplification (Fig. 5A)     | GAAACAGAACAACACCCAGCT            |
| Hsp70 genomic R   | gDNA amplification (Fig. 5A)     | ACTTCAGCAGTTTCACGCAT             |
| Actin Forward     | qPCR (Fig. 3A/B/C; Fig 4C/D/E/F) | CTGCCTCAACCTCATTGGAAAA           |
| Actin Reverse     | qPCR (Fig. 3A/B/C; Fig 4C/D/E/F) | TGTTGTAGACGGTTTCGTG              |

695

696

697

698

699 **Table 2.** Summary of the characteristics of all sequences and their deduced proteins (ORF = Open  
 700 Reading Frame; UTR = Un-Translated Region; tMW = theoretical Molecular Weight).

701

| <i>Isoform</i>    | <i>Transcript</i> |             |               |               |       | <i>Protein</i> |              |      |
|-------------------|-------------------|-------------|---------------|---------------|-------|----------------|--------------|------|
|                   | Length<br>(nt)    | ORF<br>(nt) | 5'UTR<br>(nt) | 3'UTR<br>(nt) | polyA | Length<br>(aa) | tMW<br>(kDa) | pI   |
| <i>Dt-hsp70</i>   | 2219              | 1904        | 166           | 167           | YES   | 634            | 69.536       | 5.67 |
| <i>Dt-hsc70I</i>  | 2273              | 1958        | 121           | 193           | YES   | 652            | 71.451       | 5.47 |
| <i>Dt-hsc70II</i> | 2128              | 1532        | 410           | 185           | YES   | 510            | 56.763       | 4.95 |

702

703

704
